# Supplementary material
Source: PubMed Central journal article supplement (PMC5440722)
Supplement: AEM.00095-17_zam999117855s1.pdf [file AEM.00095-17_zam999117855s1.pdf]

Supplemental data

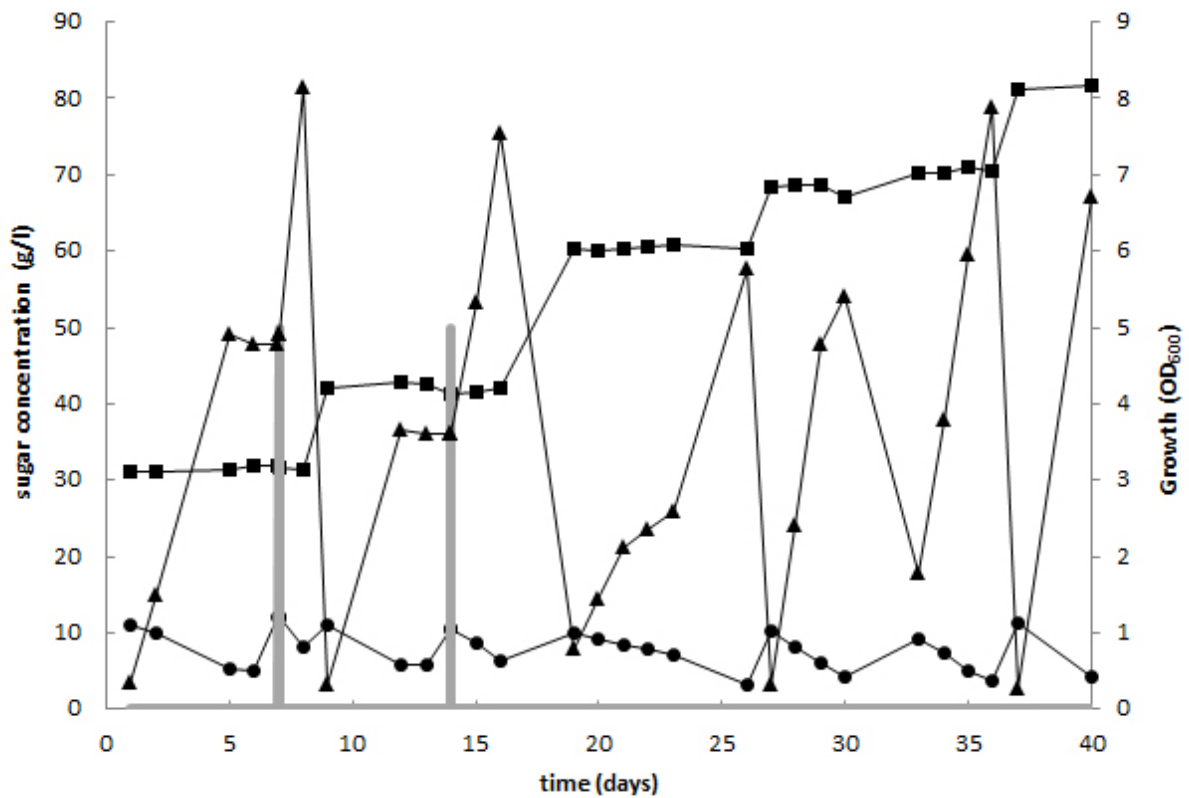

**Supplemental Figure 1.** Evolutionary engineering process of the DS69473 strain. Depicted are the D-xylose (●) and D-Glucose (■) concentration and the OD<sub>600</sub> (▲) in time. The grey line indicates the addition of 5 ml of 50% D-xylose added to 500 ml fermentor volume.

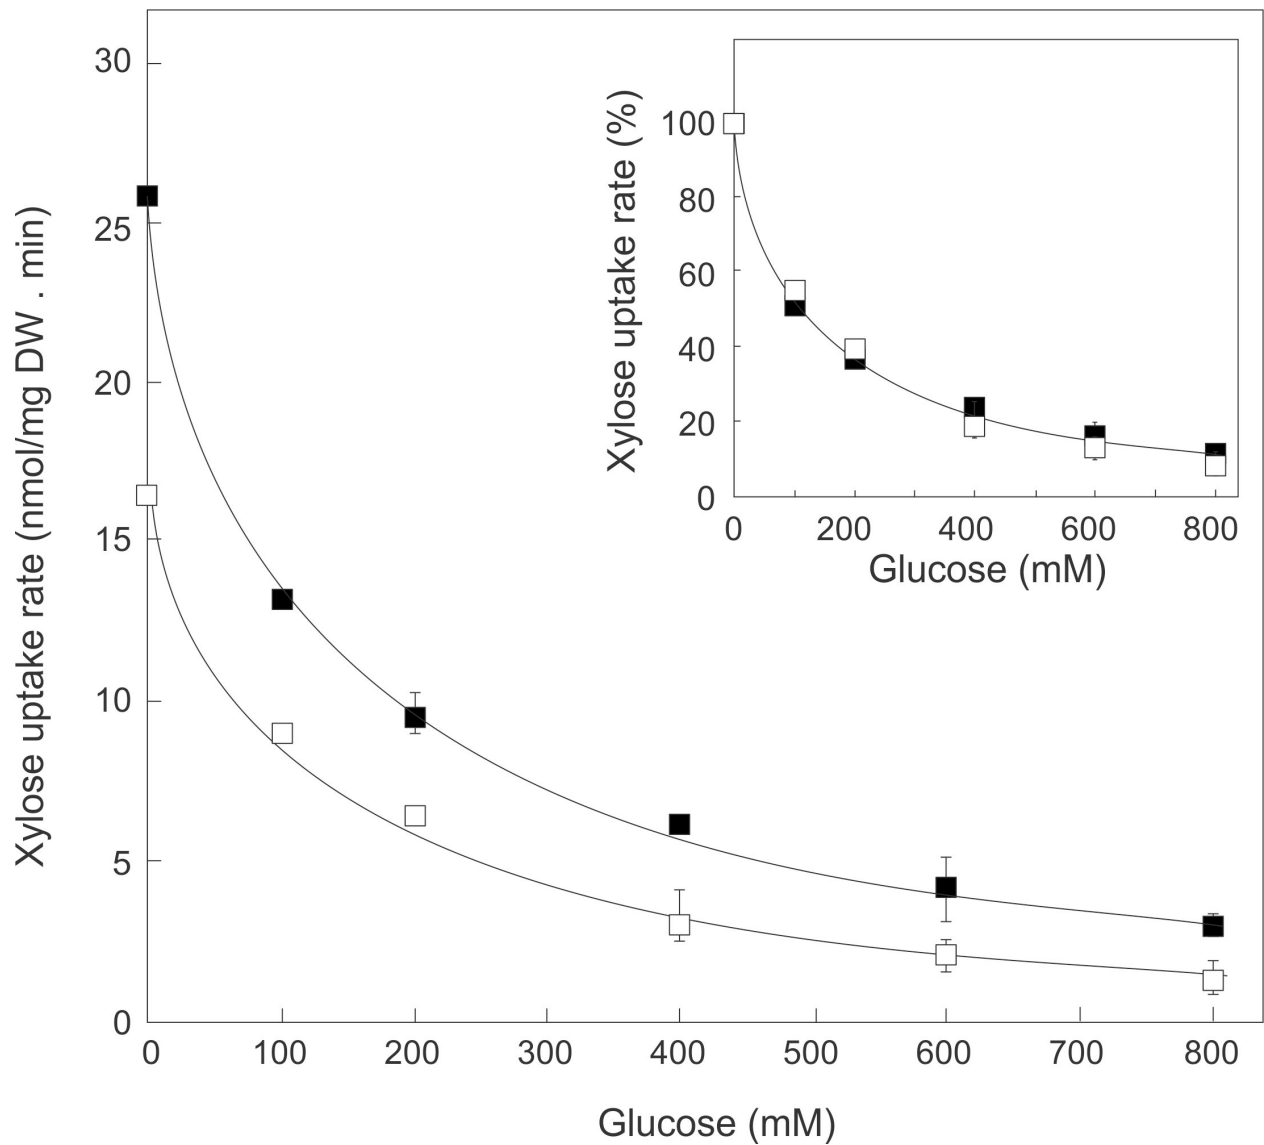

**Supplemental Figure 2.** Growth ( $\mu$ , -h) of the DS69473 strains expressing the various Cyc8 Y353 mutants in 2 % D-xylose and 12 % D-glucose after 48 hours in aerobic cultivation. The black bars indicate the Y353C mutant and the wild-type Y353Y, respectively. Error bars were obtained from biological duplicates

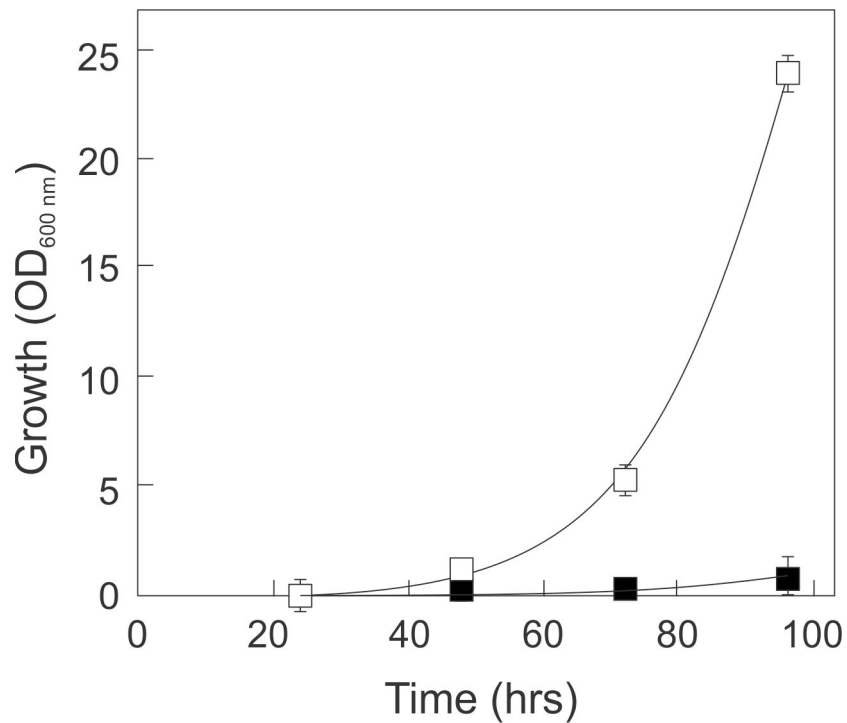

**Supplemental Figure 3.** Normalized fold expression of the *ADHI*, *FIT2*, *HXT10*, *HXT13* and *HXT15/16* genes. Gene expression was analyzed by qPCR using cells grown on minimal medium with 2% D-xylose and 6% D-glucose for the wild-type DS68616 strain (black bars), the DS68616 *CYC8* Y353C mutant strain (white bars) and the DS68616 $\Delta$ *CYC8* strain (grey bars). Fold expression was normalized relative to the *ACT1* expression in the wild-type DS68616 strain, which was set to 1.

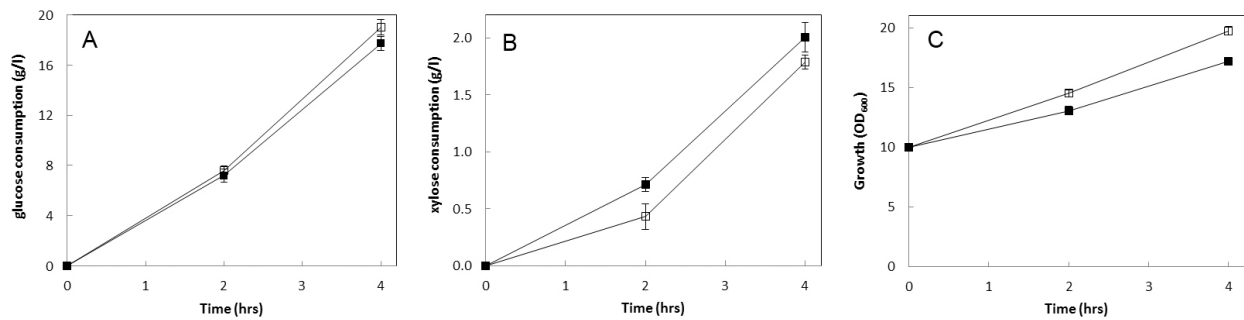

**Supplemental Figure 4.** Glucose consumption (panel A), xylose consumption (panel B) and growth (panel C) during mixed sugar fermentation of DS68616-CYC8-Y353C (■) and the wild-type DS68616-CYC8-Y353 (□) on 2% D-glucose and 2% D-xylose.

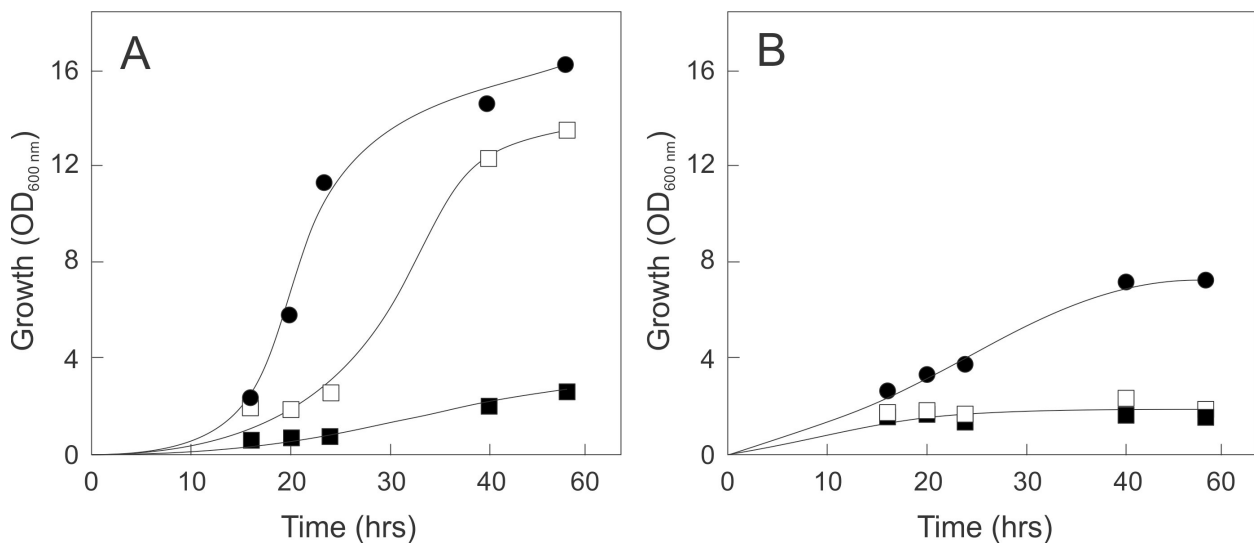

**Supplemental Figure 5.** Growth (OD<sub>600</sub>) of the DS68625-derived strains on 2% D-glucose (panel A) and 2% D-xylose + 0.05% D-maltose (panel B). Depicted are strain DS68625 with a plasmid expressing HXT10 (●), HXT15 (□), or the empty vector pRS313-P7T7 (■).

**Supplemental Table 1.** Genomic sequencing data. Mapping was done against CEN.PK113-7D and the strain DS69473 and DS69473Evo were compared. MNV, multinucleotide polymorphisms; SNP, single nucleotide polymorphisms.

| Type      | Ref | Allele | Note                                                      | Coding region change    | Amino acid change      | CDS    | Annotation                               |
|-----------|-----|--------|-----------------------------------------------------------|-------------------------|------------------------|--------|------------------------------------------|
| SNP       | A   | C      | None reliable near telomere                               |                         |                        |        |                                          |
| Deletion  | T   | -      | None reliable long stretch of Ts                          |                         |                        |        |                                          |
| Deletion  | A   | -      | Low coverage                                              |                         |                        |        |                                          |
| SNP       | T   | C      |                                                           | 1058A>G                 | Y353C                  | Cyc8p  | General transcriptional co-repressor     |
| Deletion  | A   | -      | None reliable long stretch of As                          |                         |                        |        |                                          |
| Insertion | -   | T      | None reliable long stretch of Ts                          | 1740_1741insA           | L581fs                 | Pol4p  | DNA polymerase IV                        |
| Deletion  | TA  | -      | Near assembly gap                                         |                         |                        |        |                                          |
| Insertion | -   | TT     | Also present in parent                                    |                         |                        |        |                                          |
| MNV       | TT  | GC     | Also present in parent                                    |                         |                        |        |                                          |
| Insertion | -   | GC     | Near assembly gap                                         |                         |                        |        |                                          |
| Insertion | -   | T      | None reliable long stretch of Ts                          |                         |                        |        |                                          |
| Deletion  | T   | -      | None reliable long stretch of Ts                          |                         |                        |        |                                          |
| Deletion  | C   | -      | None reliable long stretch of Ts                          |                         |                        |        |                                          |
| Insertion | -   | A      | None reliable long stretch of As                          |                         |                        |        |                                          |
| MNV       | AA  | GG     | Low coverage. caused by too large deletion in this strain | 1754_1755del<br>TTinsCC | F585S                  | Rtg2p  | Sensor of mitochondrial dysfunction      |
| Deletion  | T   | -      | Low coverage                                              |                         |                        |        |                                          |
| SNV       | A   | G      | Also present in parent                                    |                         |                        |        |                                          |
| Deletion  | AA  | -      | Also present in parent                                    |                         |                        |        |                                          |
| Deletion  | A   | -      | Also present in parent                                    |                         |                        |        |                                          |
| Insertion | -   | T      | Also present in parent                                    |                         |                        |        |                                          |
| Insertion | -   | A      | None reliable long stretch of As                          |                         |                        |        |                                          |
| Insertion | -   | T      | Also present in parent                                    |                         |                        |        |                                          |
| Insertion | -   | G      | Also present in parent                                    |                         |                        |        |                                          |
| Insertion | -   | T      | Also present in parent                                    |                         |                        |        |                                          |
| Deletion  | G   | -      | Also present in parent                                    |                         |                        |        |                                          |
| Insertion | -   | T      | Also present in parent                                    |                         |                        |        |                                          |
| SNP       | A   | T      | None reliable long stretch of Ts                          |                         |                        |        |                                          |
| Deletion  | C   | -      | None reliable long stretch of Ts                          |                         |                        |        |                                          |
| Insertion | -   | A      | None reliable long stretch of As                          |                         |                        |        |                                          |
| SNP       | C   | A      | Near assembly gap                                         | 432G>T                  |                        | Fsh2p  | Putative serine hydrolase                |
| SNP       | A   | T      | Near assembly gap                                         | 289+2T>A                |                        |        |                                          |
| Insertion | -   | T      | Also present in parent                                    | 1_2insA                 | Met1?                  | Kre1p  | Cell wall glycoprotein                   |
| Insertion | -   | T      | None reliable long stretch of Ts                          |                         |                        |        |                                          |
| Insertion | -   | A      | None reliable long stretch of As                          |                         |                        |        |                                          |
| Deletion  | A   | -      | Also present in parent                                    |                         |                        |        |                                          |
| Insertion | -   | T      | Also present in parent                                    |                         |                        |        |                                          |
| Deletion  | A   | -      | Near assembly gap                                         |                         |                        |        |                                          |
| Deletion  | A   | -      | Also present in parent                                    |                         |                        |        |                                          |
| MNV       | GGG | AAA    | Also present in parent                                    | 639_641delGG<br>GinsAAA | P213_G214d<br>elinsP_K | Spt14p | UDP-GlcNAc-binding and catalytic subunit |
| Insertion | -   | T      | Also present in parent                                    |                         |                        |        |                                          |
| Deletion  | T   | -      | Also present in parent                                    |                         |                        |        |                                          |

**Supplemental Table 2.** Summary of transcriptomics data. Depicted genes were quantified and run in an intensity difference statistical ( $p < 0.05$ ) and subsequently ranked based on fold change (FC) between DS69473 Y353 and DS69473 Y353C.

| Probe          | Gene         | Chr       | P-value      | Annotation                                                    | Y353 avg    | Y353C avg    | FC           |
|----------------|--------------|-----------|--------------|---------------------------------------------------------------|-------------|--------------|--------------|
| YOL161C        | PAU20        | XV        | 0.000        | Protein of unknown function (seripauperin multigene family)   | 0.1         | 21.7         | <b>217.0</b> |
| YBR301W        | PAU24        | II        | 0.000        | Cell wall mannoprotein; has similarity to Tir1p               | 0.7         | 50.3         | <b>75.5</b>  |
| YIR019C        | FLO11        | IX        | 0.000        | GPI-anchored cell surface glycoprotein (flocculin)            | 65.3        | 4695.0       | <b>71.9</b>  |
| YCR104W        | PAU3         | III       | 0.003        | Protein of unknown function (seripauperin multigene family)   | 0.3         | 21.7         | <b>65.0</b>  |
| <b>YEL069C</b> | <b>HXT13</b> | <b>V</b>  | <b>0.000</b> | <b>Hexose transporter</b>                                     | <b>10.7</b> | <b>367.3</b> | <b>34.3</b>  |
| YMR325W        | PAU19        | XIII      | 0.000        | Protein of unknown function (seripauperin multigene family)   | 6.0         | 196.0        | <b>32.7</b>  |
| YDR039C        | ENA2         | IV        | 0.000        | Na(+)-exporting P-type ATPase ENA2                            | 24.3        | 742.0        | <b>30.5</b>  |
| YPL282C        | PAU22        | XVI       | 0.000        | Protein of unknown function (seripauperin multigene family)   | 3.0         | 85.0         | <b>28.3</b>  |
| YDR038C        | ENA5         | IV        | 0.000        | Na(+)-exporting P-type ATPase ENA5                            | 30.7        | 839.3        | <b>27.4</b>  |
| YER011W        | TIR1         | V         | 0.000        | Cell wall mannoprotein; Srp1p/Tip1p family                    | 8.7         | 213.0        | <b>24.6</b>  |
| YBL108C-A      | PAU9         | II        | 0.012        | Protein of unknown function (seripauperin multigene family)   | 1.0         | 24.3         | <b>24.3</b>  |
| YCR010C        | ADY2         | III       | 0.000        | Acetate transporter required for normal sporulation           | 53.7        | 1286.3       | <b>24.0</b>  |
| YJR150C        | DAN1         | X         | 0.000        | Cell wall mannoprotein; has similarity to Tir1p               | 24.7        | 584.7        | <b>23.7</b>  |
| YOR394W        | PAU21        | XV        | 0.000        | Protein of unknown function (seripauperin multigene family)   | 4.0         | 87.7         | <b>21.9</b>  |
| YDR040C        | ENA1         | IV        | 0.000        | Na(+)/Li(+)-exporting P-type ATPase ENA1 PMR2 HOR6            | 41.7        | 857.3        | <b>20.6</b>  |
| YIR041W        | PAU15        | IX        | 0.006        | Protein of unknown function (seripauperin multigene family)   | 1.7         | 31.0         | <b>18.6</b>  |
| YHR139C        | SPS100       | VIII      | 0.000        | Protein required for spore wall maturation                    | 12.3        | 178.3        | <b>14.5</b>  |
| YGR294W        | PAU12        | VII       | 0.018        | Protein of unknown function (seripauperin multigene family)   | 4.7         | 55.3         | <b>11.9</b>  |
| YNL117W        | MLS1         | XIV       | 0.007        | Malate synthase. enzyme of the glyoxylate cycle               | 214.3       | 2308.7       | <b>10.8</b>  |
| YIL162W        | SUC2         | IX        | 0.002        | Invertase; sucrose hydrolyzing enzyme                         | 1194.0      | 12521.7      | <b>10.5</b>  |
| YDL246C        | SOR2         | IV        | 0.013        | Protein of unknown function; 99% identical to the Sor1p       | 128.0       | 1291.7       | <b>10.1</b>  |
| YJR159W        | SOR1         | X         | 0.005        | Sorbitol dehydrogenase                                        | 115.0       | 1151.0       | <b>10.0</b>  |
| YMR175W        | SIP18        | XIII      | 0.002        | Phospholipid-binding hydrophilin                              | 14.0        | 136.3        | <b>9.7</b>   |
| YDR536W        | STL1         | IV        | 0.007        | Glycerol proton symporter of the plasma membrane              | 123.3       | 1179.3       | <b>9.6</b>   |
| YGR088W        | CTT1         | VII       | 0.031        | Cytosolic catalase T                                          | 134.0       | 1212.0       | <b>9.0</b>   |
| <b>YDL245C</b> | <b>HXT15</b> | <b>IV</b> | <b>0.003</b> | <b>Hexose transporter</b>                                     | <b>54.0</b> | <b>485.0</b> | <b>9.0</b>   |
| YOR382W        | FIT2         | XV        | 0.034        | Mannoprotein that is incorporated into the cell wall          | 254.3       | 2210.7       | <b>8.7</b>   |
| YNR060W        | FRE4         | XIV       | 0.000        | Ferric reductase                                              | 47.3        | 401.7        | <b>8.5</b>   |
| YOR391C        | HSP33        | XV        | 0.000        | Possible chaperone and cysteine protease                      | 22.7        | 191.7        | <b>8.5</b>   |
| <b>YJR158W</b> | <b>HXT16</b> | <b>X</b>  | <b>0.000</b> | <b>Hexose transporter</b>                                     | <b>38.0</b> | <b>315.7</b> | <b>8.3</b>   |
| YPL272C        | PB1          | XVI       | 0.035        | Putative protein of unknown function                          | 145.3       | 1200.3       | <b>8.3</b>   |
| <b>YFLO11W</b> | <b>HXT10</b> | <b>VI</b> | <b>0.014</b> | <b>Hexose transporter</b>                                     | <b>15.7</b> | <b>127.0</b> | <b>8.1</b>   |
| YMR322C        | SNO4         | XIII      | 0.009        | Possible chaperone and cysteine protease                      | 17.0        | 130.7        | <b>7.7</b>   |
| YOR383C        | FIT3         | XV        | 0.016        | Mannoprotein that is incorporated into the cell wall          | 760.7       | 5707.7       | <b>7.5</b>   |
| YNR073C        |              | XIV       | 0.000        | Putative mannitol dehydrogenase; paralog of DSF1              | 37.7        | 276.0        | <b>7.3</b>   |
| YEL039C        | CYC7         | V         | 0.000        | cytochrome c isoform 2 iso-2-cytochrome c                     | 25.0        | 182.3        | <b>7.3</b>   |
| YLR307C-A      |              | XII       | 0.014        | Putative protein of unknown function                          | 176.7       | 1261.7       | <b>7.1</b>   |
| YEL070W        | DSF1         | V         | 0.000        | Putative mannitol dehydrogenase                               | 41.7        | 296.0        | <b>7.1</b>   |
| YER053C-A      |              | V         | 0.037        | Protein of unknown function                                   | 11.0        | 74.7         | <b>6.8</b>   |
| YMR244W        |              | XIII      | 0.020        | Putative protein of unknown function                          | 141.0       | 942.7        | <b>6.7</b>   |
| YER065C        | ICL1         | V         | 0.041        | Isocitrate lyase                                              | 1288.0      | 8385.3       | <b>6.5</b>   |
| YDR133C        |              | IV        | 0.009        | Dubious open reading frame                                    | 650.7       | 4216.0       | <b>6.5</b>   |
| YOL084W        | PHM7         | XV        | 0.000        | Protein of unknown function                                   | 56.3        | 364.3        | <b>6.5</b>   |
| YAR070C        |              | I         | 0.024        | Dubious open reading frame                                    | 5.3         | 34.0         | <b>6.4</b>   |
| YGR067C        |              | VII       | 0.000        | Putative protein of unknown function                          | 68.0        | 433.0        | <b>6.4</b>   |
| YIL011W        | TIR3         | IX        | 0.006        | Cell wall mannoprotein; Srp1p/Tip1p family                    | 112.0       | 704.3        | <b>6.3</b>   |
| YAL062W        | GDH3         | I         | 0.021        | glutamate dehydrogenase (NADP(+)) GDH3 FUN51                  | 186.0       | 1166.0       | <b>6.3</b>   |
| YPL280W        | HSP32        | XVI       | 0.000        | Possible chaperone and cysteine protease                      | 24.7        | 145.3        | <b>5.9</b>   |
| YMR095C        | SNO1         | XIII      | 0.004        | Protein of unconfirmed function                               | 92.7        | 545.7        | <b>5.9</b>   |
| YBR117C        | TKL2         | II        | 0.031        | Transketolase; paralog of TKL1                                | 78.3        | 461.0        | <b>5.9</b>   |
| YJR094C        | IME1         | X         | 0.000        | Master regulator of meiosis                                   | 15.7        | 91.7         | <b>5.9</b>   |
| YDR070C        | FMP16        | IV        | 0.000        | Protein of unknown function                                   | 41.3        | 235.3        | <b>5.7</b>   |
| YLR154C-H      |              | XII       | 0.027        | Putative protein of unknown function; paralog of YLR157C-C    | 141.7       | 801.3        | <b>5.7</b>   |
| YPL223C        | GRE1         | XVI       | 0.006        | Hydrophilin essential in desiccation-rehydration process      | 127.7       | 706.3        | <b>5.5</b>   |
| YEL049W        | PAU2         | V         | 0.003        | Member of the seripauperin multigene family                   | 59.0        | 324.3        | <b>5.5</b>   |
| YOL150C        |              | XV        | 0.001        | Dubious open reading frame                                    | 47.0        | 250.0        | <b>5.3</b>   |
| YBR072W        | HSP26        | II        | 0.047        | Small heat shock protein (sHSP) with chaperone activity       | 479.0       | 2540.3       | <b>5.3</b>   |
| YER096W        | SHC1         | V         | 0.000        | Sporulation-specific activator of Chs3p (chitin synthase III) | 44.0        | 220.3        | <b>5.0</b>   |

CONFIDENTIAL

|           |       |      |       |                                                                      |         |        |            |
|-----------|-------|------|-------|----------------------------------------------------------------------|---------|--------|------------|
| YGL158W   | RCK1  | VII  | 0.023 | Protein kinase involved in oxidative stress; paralog of RCK1         | 10.7    | 53.3   | <b>5.0</b> |
| YDR534C   | FIT1  | IV   | 0.004 | Mannoprotein that is incorporated into the cell wall                 | 32.3    | 161.0  | <b>5.0</b> |
| YNL270C   | ALP1  | XIV  | 0.007 | Arginine transporter; paralog of CAN1                                | 56.7    | 281.0  | <b>5.0</b> |
| YIL099W   | SGA1  | IX   | 0.005 | glucan 1.4-alpha-glucosidase                                         | 78.0    | 380.7  | <b>4.9</b> |
| YIR028W   | DAL4  | IX   | 0.006 | Allantoin permease                                                   | 58.3    | 284.3  | <b>4.9</b> |
| YBR147W   | RTC2  | II   | 0.028 | Putative vacuolar membrane transporter; paralog of YPQ1              | 92.7    | 446.0  | <b>4.8</b> |
| YMR094W   | CTF13 | XIII | 0.013 | Subunit of the CBF3 complex                                          | 37.3    | 176.0  | <b>4.7</b> |
| YMR195W   | ICY1  | XIII | 0.015 | Protein of unknown function; paralog of ICY2                         | 116.7   | 549.3  | <b>4.7</b> |
| YGR065C   | VHT1  | VII  | 0.034 | High-affinity plasma membrane H <sup>+</sup> -biotin symporter       | 288.0   | 1328.7 | <b>4.6</b> |
| YLL055W   | YCT1  | XII  | 0.042 | High-affinity cysteine-specific transporter                          | 425.7   | 1959.0 | <b>4.6</b> |
| YHR137C-A |       | VIII | 0.021 | Dubious open reading frame                                           | 118.0   | 536.7  | <b>4.5</b> |
| YHR137W   | ARO9  | VIII | 0.034 | aromatic-amino-acid:2-oxoglutarate transaminase                      | 239.7   | 1058.7 | <b>4.4</b> |
| YIL111W   | COX5B | IX   | 0.023 | cytochrome c oxidase subunit Vb                                      | 31.3    | 136.7  | <b>4.4</b> |
| YPR027C   |       | XVI  | 0.005 | Putative protein of unknown function                                 | 30.0    | 130.3  | <b>4.3</b> |
| YOL154W   | ZPS1  | XV   | 0.007 | Putative GPI-anchored protein                                        | 42.0    | 179.0  | <b>4.3</b> |
| YGL162W   | SUT1  | VII  | 0.021 | Transcription factor of the Zn(II)2Cys6 family; paralog of SUT2      | 45.0    | 186.3  | <b>4.1</b> |
| YDL085W   | NDE2  | IV   | 0.007 | NADH-ubiquinone reductase (H <sup>+</sup> )-translocating) NDE2 NDH2 | 88.7    | 364.0  | <b>4.1</b> |
| YPL036W   | PMA2  | XVI  | 0.009 | H <sup>+</sup> -exporting P2-type ATPase PMA2                        | 107.3   | 436.7  | <b>4.1</b> |
| YIL020C   | HIS6  | IX   | 0.034 | 1-(5-phosphoribosyl)-5- ((5-phosphoribosylamino)methylidene          | 40.0    | 162.0  | <b>4.1</b> |
| YOR393W   | ERR1  | XV   | 0.024 | phosphopyruvate hydratase ERR1                                       | 25.3    | 102.0  | <b>4.0</b> |
| YJL089W   | SIP4  | X    | 0.007 | C6 zinc cluster transcriptional activator                            | 45.3    | 180.0  | <b>4.0</b> |
| YLR159C-A |       | XII  | 0.006 | Putative protein of unknown function                                 | 15.7    | 62.0   | <b>4.0</b> |
| YDR354C-A |       | IV   | 0.020 | Dubious open reading frame                                           | 35.7    | 138.0  | <b>3.9</b> |
| YIL166C   |       | IX   | 0.015 | Putative protein with similarity to allantoate permease              | 47.3    | 180.7  | <b>3.8</b> |
| YMR323W   | ERR3  | XIII | 0.007 | phosphopyruvate hydratase ERR3                                       | 39.7    | 148.7  | <b>3.7</b> |
| YOR237W   | HES1  | XV   | 0.028 | oxysterol-binding protein related protein HES1 OSH5                  | 28.0    | 103.0  | <b>3.7</b> |
| YOR100C   | CRC1  | XV   | 0.004 | Mitochondrial inner membrane carnitine transporter                   | 79.7    | 291.7  | <b>3.7</b> |
| YPL281C   | ERR2  | XVI  | 0.024 | phosphopyruvate hydratase ERR2                                       | 26.3    | 95.0   | <b>3.6</b> |
| YGR144W   | THI4  | VII  | 0.005 | thiamine thiazole synthase MOL1 ESP35                                | 37.0    | 133.0  | <b>3.6</b> |
| YGR052W   | FMP48 | VII  | 0.008 | Putative protein of unknown function                                 | 29.7    | 103.7  | <b>3.5</b> |
| YBL075C   | SSA3  | II   | 0.041 | Hsp70 family ATPase SSA3 YG106                                       | 98.7    | 339.7  | <b>3.4</b> |
| YDL023C   |       | IV   | 0.040 | Dubious open reading frame                                           | 50.7    | 168.0  | <b>3.3</b> |
| YJR025C   | BNA1  | X    | 0.037 | 3-hydroxyanthranilate 3.4-dioxygenase HAD1                           | 178.3   | 565.7  | <b>3.2</b> |
| YMR194C-B | CMC4  | XIII | 0.047 | Protein localizes to the mitochondrial intermembrane space           | 43.7    | 125.0  | <b>2.9</b> |
| YIR032C   | DAL3  | IX   | 0.042 | ureidoglycolate hydrolase                                            | 44.7    | 126.7  | <b>2.8</b> |
| YBR299W   | MAL32 | II   | 0.031 | alpha-glucosidase MAL32 MALS MAL35                                   | 25252.7 | 3741.0 | <b>0.1</b> |
| YBR093C   | PHO5  | II   | 0.000 | Repressible acid phosphatase                                         | 675.0   | 74.3   | <b>0.1</b> |

**Supplemental Table 3.** Strains and plasmids used in this study

| Strain/ plasmid      | Relevant genotype and/or characteristics                                                                                                                                          | Source/reference     |
|----------------------|-----------------------------------------------------------------------------------------------------------------------------------------------------------------------------------|----------------------|
| <b>Strains</b>       |                                                                                                                                                                                   |                      |
| <i>S. cerevisiae</i> |                                                                                                                                                                                   |                      |
| DS68616              | <i>Mat a. ura3-52. leu2-112. gre3::loxP. loxP-Ptpi:TAL1. loxP-Ptpi::RKII. loxP-Ptpi-TKL1. loxP-Ptpi-RPE1. delta::Padh1XKSITcyc1-LEU2. delta::URA3-Ptpi-xylA-Tcyc1. His3::LoxP</i> | DSM. The Netherlands |
| DS68625              | DS68616. <i>his3::loxP. hxt2::loxP-kanMX-loxP. hxt367::loxP-hphMX-loxP. hxt145::loxP-natMX-loxP. gal2::loxP-zeoMX-loxP</i>                                                        | [1,2]                |
| DS69473              | DS68616 <i>his3::loxP glk1::lox72 hxk1::loxP-hphMX-loxP hxk2::lox72 gal1::loxP</i>                                                                                                | This paper           |
| DS69473Evo           | DS69473-derivative after evolutionary engineering by chemostat cultivation on xylose in presence of glucose                                                                       | This paper           |
| <b>Plasmids</b>      |                                                                                                                                                                                   |                      |
| pRS313               | <i>E. coli</i> /yeast shuttle vector; <i>CEN6. ARSH4. HIS3. Amp<sup>r</sup></i>                                                                                                   | [3]<br>This paper    |
| pRS313-P7T7_Hxt10    | pRS313 containing the promotor and terminator of HXT7 [1] and expressing HXT10                                                                                                    | This paper           |
| pRS313-P7T7_Hxt15    | pRS313 containing the promotor and terminator of HXT7 [1] and expressing HXT15                                                                                                    |                      |



**Supplemental Table 4.** Oligonucleotides used in cloning and sequencing.

| Name                              | Sequence (5' → 3')                                                                                                                             |
|-----------------------------------|------------------------------------------------------------------------------------------------------------------------------------------------|
| <b>Hexokinase deletion strain</b> |                                                                                                                                                |
| GLK1-psuc227f                     | TATCACGTGCAGCCCAGGATAATTTTCAGGACACGTGTTTCGAAAGGTTTGT<br>CGCTCCGATCGACCTCGAGTACCGTTTCG                                                          |
| GLK1-psuc225r                     | ATTTAGTGAGCTGTTTCTTGTCAAAAACAACCAACGGAAGAGGGGCGAGGCTGT<br>TTCTCCGCGGATCCTACCGTTCGTATAG                                                         |
| HXK2-psuc227f                     | CCACGAAATTACCTCCTGCTGAGGCGAGCTTGCAAATATCGTGTCCAATTCC<br>GTGATGTCTCGACCTCGAGTACCGTTTCG                                                          |
| HXK2-psuc225r                     | TACAAAAGAAAGTACGCAAGCTATCTAGAGGAAGTGTAGAGAGGGTTAAAA<br>TTGGCGTGCCGATCCTACCGTTCGTATAG                                                           |
| HXK1_loxP_f                       | TCGGTTTCACTTCTTGGGAATATTCTACCGTTCCTTCATCTTGTATTCCGGAT<br>CCACTAGCATAACTTCG                                                                     |
| HXK1_loxP_r                       | GACAATGCAGCAATAACAGCAGCACCTGCACCTGAACCATCCTCAGCTTTGG<br>GCCGCCAGTGTGATGG                                                                       |
| GAL1_loxP_f                       | TGTGCCTCGCGCCGACTGCTCCGAACAATAAAGATTCTACAATACTAGCGG<br>ATCCACTAGCATAACTTCG                                                                     |
| GAL1_loxP_r                       | AGGTATCCAAAACGCAGCGGTTGAAAGCATATCAAGAATTTTGTCCCTGTTT<br>GGGCCGCCAGTGTGATGG                                                                     |
| <b>CYC8 Y353C mutation</b>        |                                                                                                                                                |
| F kanMX 5'tail                    | CCCTTTTCTTCTTTTGTGCACCACTCAGGGCACGAGAAAAGCTT<br>ATTTTTTTGTAACGGCCGCCA                                                                          |
| R KanMX + Cyc8                    | CCACTAAGAACGGAGTGTGCACGCTAGATATCGTCGACACTGGATGGC                                                                                               |
| F KanMX + Cyc8                    | GCCATCCAGTGTGACGATATCTAGCGTGCACACTCCGTTCTTAGTGG                                                                                                |
| R Cyc8                            | GTACCTAGATCGTACCAAACCTTCAC                                                                                                                     |
| F Cyc8                            | GGAAGCCTACGAGCATGTCTTGG                                                                                                                        |
| <b>CYC8 Y353X Crispr/Cas9</b>     |                                                                                                                                                |
| F KanMX MunI                      | GATCCAATTGAGCTTGCCTCGTCCCCGCCG                                                                                                                 |
| R KanMX Adel                      | CCTTCACGTAGTGTGACACTGGATGGCGGCGTTAG                                                                                                            |
| targetRNA F Cyc8                  | TGCGCATGTTTCGGCGTTTCGAACTTCTCCGCAGTGAAAGATAAATGATCGG<br><u>CTTTGTGTACGCGTCTAGTTTTAGAGCTAGAAATAGCAAGTTAAAATAAGG</u><br>CTAGTCCGTTATCAAC         |
| targetRNA R Cyc8                  | GTTGATAACGGACTAGCCTTATTTAACTTGCTATTTCTAGCTCTAAAAC <u>TAG</u><br><u>ACGCGTACACAAGAGCCGATCATTTATCTTTCACTGCGGAGAAGTTTCGAAC</u><br>GCCGAAACATGCGCA |
| F repair Cyc8 WNN                 | GTTTTATATTACCAAATTTCTCAATACAGAGACGCTTTAGACGCGWNNACAA<br>GAGCCATAAGATTAATCCTTATATTAGTGAAGTTTGG                                                  |
| R repair Cyc8 WNN                 | CCAACTTCACTAATATAAGGATTTAATCTTATGGCTCTTGTNNWCGGTCT<br>AAAGCGTCTCTGTATTGAGAAATTTGGTAATATAAAAC                                                   |
| F repair Cyc8 SNN                 | GTTTTATATTACCAAATTTCTCAATACAGAGACGCTTTAGACGCGSNNACAA<br>GAGCCATAAGATTAATCCTTATATTAGTGAAGTTTGG                                                  |
| R repair Cyc8 SNN                 | CCAACTTCACTAATATAAGGATTTAATCTTATGGCTCTTGTNNSCGCGTCTA<br>AAGCGTCTCTGTATTGAGAAATTTGGTAATATAAAAC                                                  |
| <b>CYC8 deletion</b>              |                                                                                                                                                |
| F 5'FR cyc8 kanMX                 | TACAACTACAACAGCAACAACAACAACAAAACACGACTGGAAAAAAAAAAAA<br>TTAGGAAAAAGCTTGCCCTCGTCCCCGCCGGG                                                       |
| R 3'FR cyc8 kanMX                 | GCTACACAACATTTCTCGTTGATTATAAATTAGTAGATTAATTTTTTGAATGC<br>AAACTTTCTAGATATCGTCGACACTGGATGGCGG                                                    |

***HXT* Overexpression**

|               |                                                                             |
|---------------|-----------------------------------------------------------------------------|
| R Hxt10 XbaI  | <i>ATGCTCTAGA</i> ATGGTTAGTTCAAGTGTTCATTTGGG                                |
| R Hxt10 Cfr9I | GACTCCCGGGTATTTACTATCAACAATAACTAATGGTGTACTGCTTGTGGT<br>TGTGGTGTTCCTAGAACTGG |
| F Hxt15 XbaI  | ATCGATCTAGAATGGCAAGCGAACAGTCCTCACC                                          |
| R Hxt15 Cfr9I | TAGACCCCGGGTCAATTAAAACCTTTGGGAACCTCAA                                       |

---

Italic: restriction enzyme site

Underlined: sequence of the targets in *CYC8*

Bold: Codon 353 in *CYC8*

**Supplemental Table 5.** Oligonucleotides used in qPCR.

| Name   | Sequence (5' → 3')         |
|--------|----------------------------|
| ActinF | GGATTCTGAGGTTGCTGCTTTGG    |
| ActinR | GAGCTTCATCACCAACGTAGGAG    |
| HXT1F  | TGTTCTCTGTACACCGTTGACCG    |
| HXT1R  | AGATCATAACAGTTACCAGCACCC   |
| HXT2F  | CTTCGCATCCACTTTCGTG        |
| HXT2R  | AATCATGACGTTACCGGCAGCC     |
| HXT3F  | GAAGCTAGAGCTGCTGGTTCAGC    |
| HXT6R  | ACAACGACATAAGGAATTGGAGCC   |
| HXT4F  | ATGGAGAGTTCCATTAGGTCTAGG   |
| HXT4R  | ATAACAGCTGGATCGTCTGCGC     |
| HXT5F  | TTGCTATGTCGTCTATGCCTCTG    |
| HXT5R  | AGATAAGGACATAGGCAACGGG     |
| HXT7F  | GGGTGCTGCATCCATGACTGC      |
| HXT7R  | ACAACGACATAAGGAATTGGAGCC   |
| HXT8F  | GTACTACTATCTTCAAATCTGTCTGG |
| HXT8R  | CTTGTGACGCCAACGGAGGCC      |
| HXT9F  | CCATTGAGAGGTTTGGACGCCG     |
| HXT9R  | ACACAATCATAACAGTTACCGGCCG  |
| HXT10F | GGAATGCAAGACTCTTTCGAGAC    |
| HXT10R | CTAGTGACGCCAACGGTGGCG      |
| HXT11F | GCCACTCAATGGAGAGTCGGC      |
| HXT11R | CAACTAGCAAGGCTGGATCGTC     |
| HXT12F | CACCATCTTCAAATCTGTCTGGTC   |
| HXT12R | CAATCATAACAGTTACCGGCACCC   |
| HXT13F | CCCTCATGGCCAGGACGGTC       |
| HXT13R | TTGCCATAACCAGTTGCATGCAG    |
| HXT14F | GCCTTAGTAGTGTACTGCATCGGT   |
| HXT14R | TGATACGTAGATACCATGGAGCC    |
| HXT15F | GAGGCCTGTGTCTCCATCGCC      |
| HXT15R | CACAAGAATACCTGTGATCAAACG   |
| HXT16F | CAAGGAAGTATAGTAATACTGCGC   |
| HXT16R | TTGGCGATGGAGACACAGGCC      |
| GAL2F  | TCAATGGAGAGTTCCATTAGGGC    |
| GAL2R  | CTGGACGGCAGGATCCTCTGG      |
| ADH1 F | CAGATCCATCGGTGGTGAAGTC     |
| ADH1 R | CTCTGGTGTGACGCTCTGTTACC    |
| FIT2 F | CACTAAGGTCGTTACCGACAC      |
| FIT2 R | GCTTGAGTGACGGTCTTGGTG      |
| Cas9F  | TCTGCTGGCCCAGATCGGC        |
| Cas9R  | GCAGTTGCTGTCTGACAAGGG      |

## References

1. Shin HY, Nijland JG, de Waal PP, de Jong RM, Klaassen P, Driessen AJM: **An engineered cryptic Hxt11 sugar transporter facilitates glucose–xylose co-consumption in *Saccharomyces cerevisiae*.** *Biotechnol Biofuels* 2015, **8**:176.22.
2. Nijland JG, Shin HY, de Jong RM, de Waal PP, Klaassen P, Driessen AJ: **Engineering of an endogenous hexose transporter into a specific D-xylose transporter facilitates**

**glucose-xylose co-consumption in *Saccharomyces cerevisiae*.** *Biotechnol Biofuels* 2014, **7**:168.

3. Sikorski RS, Hieter P: **A system of shuttle vectors and yeast host strains designed for efficient manipulation of DNA in *Saccharomyces cerevisiae*.** *Genetics*. 1989, **122**:19-27.
